# Supplementary material for: Structure, evolution, and comparative genomics of tetraploid cotton based on a high-density genetic linkage map
Source: PubMed Central journal article supplement — DNA Res. 2016 Apr 15;23(3):283–93. doi: 10.1093/dnares/dsw016 (PMC4909315; doi:10.1093/dnares/dsw016), 2016-04-15
Supplement: supp_dsw016_dsw016supp_fig4.pdf [file supp_dsw016_dsw016supp_fig4.pdf]

**A**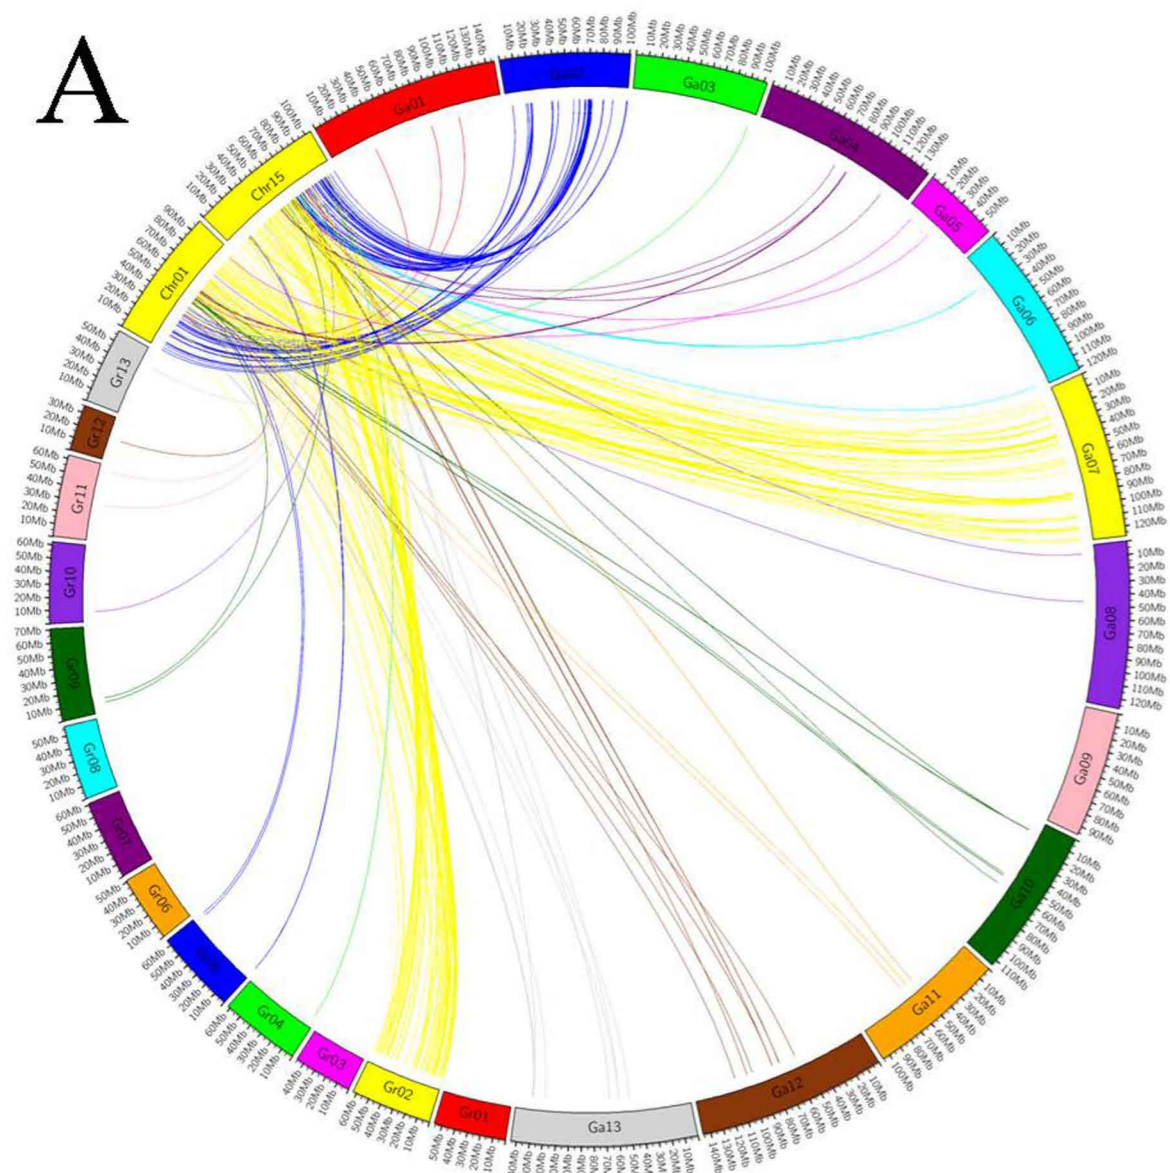**B**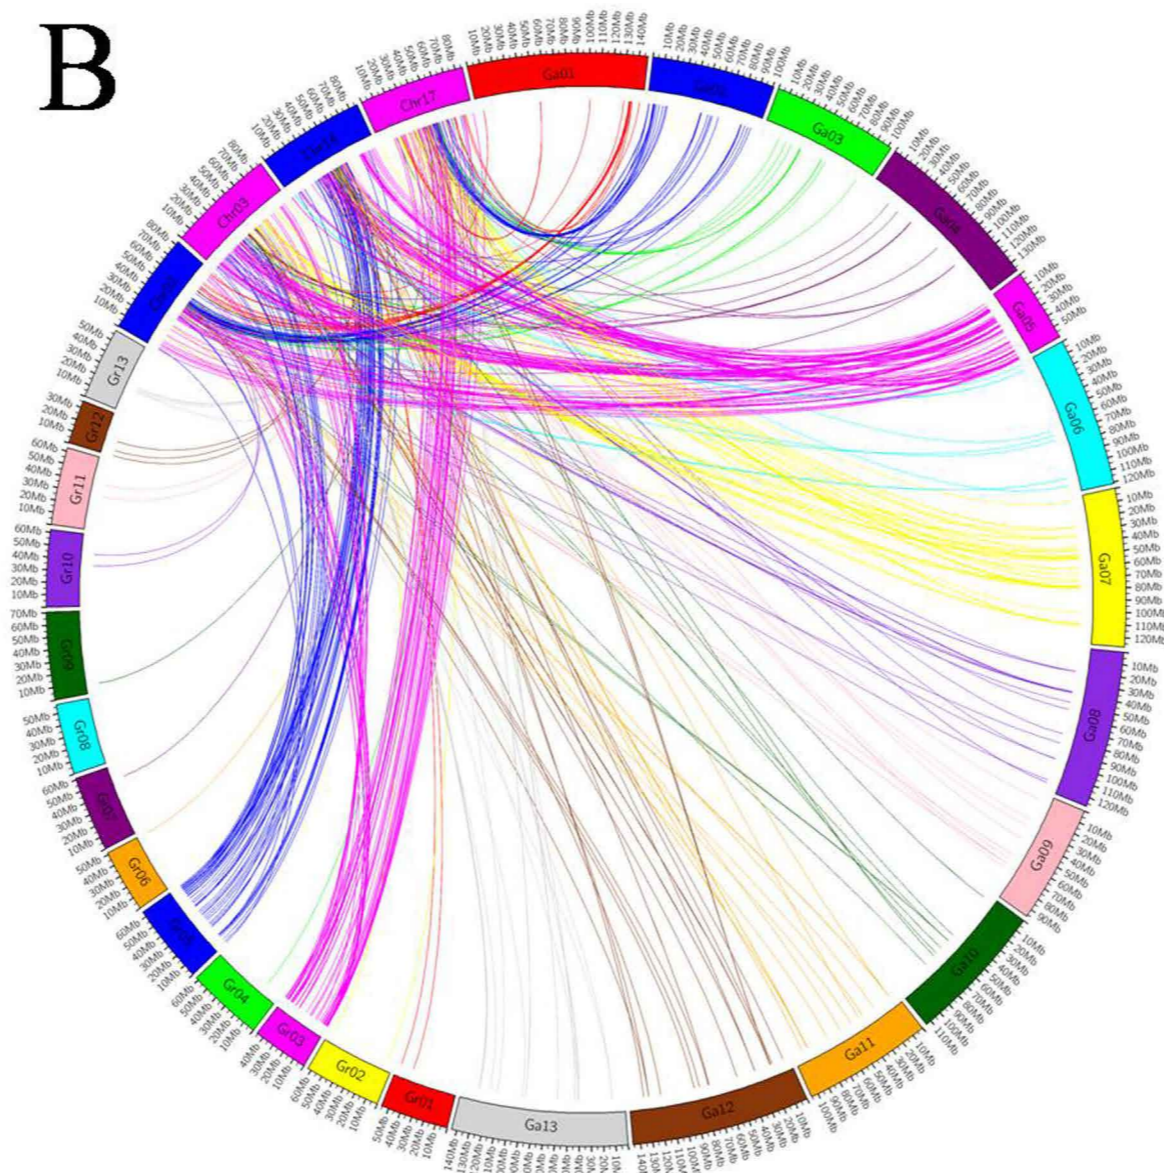**C**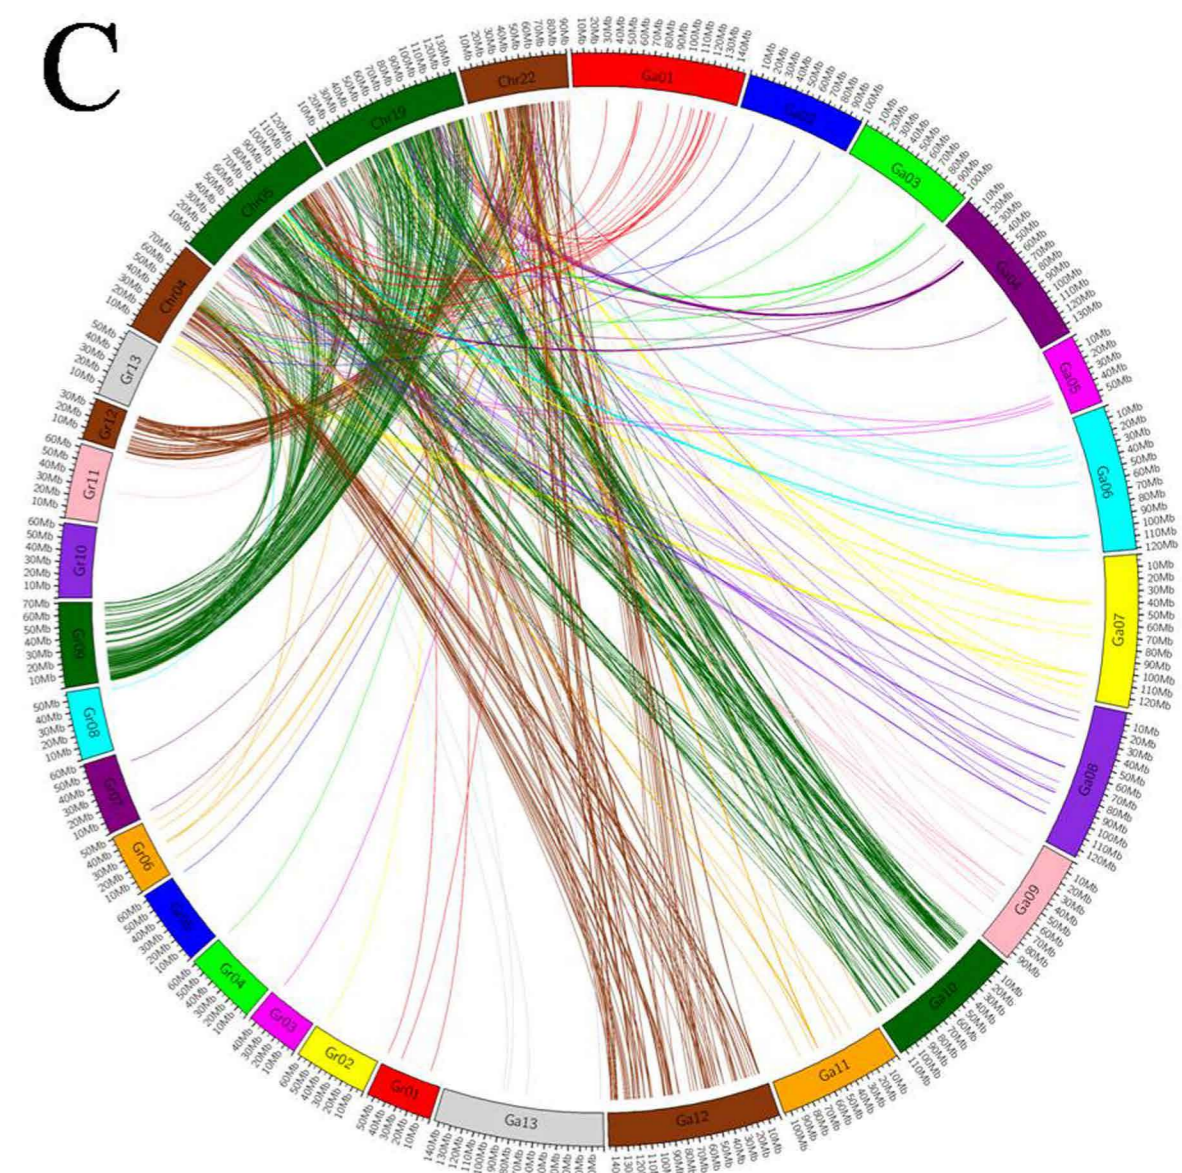

Figure S4. Blast analysis between tetraploid cotton and mix genome of two diploid cottons for several special homologous chromosome pairs.
